# Supplementary material for: Economic Value of Flood Forecasts and Early Warning Systems: A Review
Source: Atypon-hosted journal article supplement (doi:10.1061/nhrefo.nheng-2094), 2024-08-12
Supplement: supplemental materials_nhrefo.nheng-2094_houtven.pdf [file supplemental%20materials_nhrefo.nheng-2094_houtven.pdf]

# SUPPLEMENTAL MATERIALS

*ASCE Natural Hazards Review*

## Economic Value of Flood Forecasts and Early Warning Systems: A Review

George Van Houtven

**DOI:** 10.1061/NHREFO.NHENG-2094

© ASCE 2024

[www.ascelibrary.org](http://www.ascelibrary.org)

**Table S1. Summary of Selected Studies**

| Study                               | Publication Type | Country or Region | VOI Method |                | Prevented Damage Method |                              |                   |                     |                  |
|-------------------------------------|------------------|-------------------|------------|----------------|-------------------------|------------------------------|-------------------|---------------------|------------------|
|                                     |                  |                   | Deductive  | Inductive (SP) | Review or Conceptual    | Household or Business Survey | Expert Assessment | Flood Risk Modeling | Benefit Transfer |
| Abaza et al (2013)                  | journal article  | Canada            | X          |                |                         |                              |                   |                     |                  |
| Alfonso et al (2016)                | journal article  | France            | X          |                |                         |                              |                   |                     |                  |
| Arias et al (2015)                  | report           | Philippines       |            | X              |                         |                              |                   |                     |                  |
| Arnal et al (2016)                  | journal article  | UK                |            | X              |                         |                              |                   |                     |                  |
| Boucher et al (2012)                | journal article  | Canada            | X          |                |                         |                              |                   |                     |                  |
| Buizza (2008)                       | journal article  | Italy             | X          |                |                         |                              |                   |                     |                  |
| Carroll (1986)                      | conf. proc.      | US                |            |                |                         |                              |                   | X                   |                  |
| Carsell (2004)                      | journal article  | US                |            |                |                         |                              |                   | X                   |                  |
| Chatterton & Penning-Rowsell (1981) | journal article  | UK                |            |                |                         |                              |                   | X                   |                  |
| Dale et al (2014)                   | journal article  | UK                |            |                |                         |                              |                   |                     | X                |
| Day & Lee (1976)                    | journal article  | US                |            |                |                         |                              |                   | X                   |                  |
| Day (1970)                          | report           | US                |            |                |                         |                              |                   | X                   |                  |
| Elmer et al (2010)                  | journal article  | Germany           |            |                |                         |                              | X                 |                     |                  |
| Hallegate (2012)                    | report           | Global            |            |                | X                       |                              |                   |                     |                  |
| Holland (2008)                      | report           | Fiji              |            |                |                         |                              |                   | X                   |                  |
| Johnson et al (2020)                | journal article  | US                |            |                |                         |                              |                   |                     | X                |
| Kienzler et al (2015)               | journal article  | Germany           |            |                |                         |                              | X                 |                     |                  |
| Kreibich et al (2005)               | journal article  | Germany           |            |                |                         |                              | X                 |                     |                  |
| Kreibich et al (2007)               | journal article  | Germany           |            |                |                         |                              | X                 |                     |                  |
| Kreibich et al (2011)               | journal article  | Germany           |            |                |                         |                              | X                 |                     |                  |
| Kreibich et al (2017)               | journal article  | Germany           |            |                |                         |                              | X                 |                     |                  |
| Lim et al (2022)                    | journal article  | US                |            | X              |                         |                              |                   |                     |                  |
| Marvi (2020)                        | journal article  | US                |            |                | X                       |                              |                   |                     |                  |
| Matte et al (2017)                  | journal article  | Canada            | X          |                |                         |                              |                   |                     |                  |
| McBean et al (1988)                 | journal article  | Canada            |            |                |                         |                              |                   | X                   |                  |

| Study                          | Publication Type | Country or Region | VOI Method |                | Prevented Damage Method |                              |                   |                     |                  |
|--------------------------------|------------------|-------------------|------------|----------------|-------------------------|------------------------------|-------------------|---------------------|------------------|
|                                |                  |                   | Deductive  | Inductive (SP) | Review or Conceptual    | Household or Business Survey | Expert Assessment | Flood Risk Modeling | Benefit Transfer |
| Merz et al (2013)              | journal article  | Germany           |            |                |                         | X                            |                   |                     |                  |
| Mohor et al (2020)             | journal article  | Germany           |            |                |                         | X                            |                   |                     |                  |
| Muluye (2011)                  | journal article  | Canada            | X          |                |                         |                              |                   |                     |                  |
| NHWC (2002)                    | report           | US                |            |                |                         |                              |                   |                     | X                |
| Nofal et al (2021)             | journal article  | US                |            |                |                         |                              |                   | X                   |                  |
| Oddo & Bolten (2019)           | journal article  | Thailand          | X          |                |                         |                              |                   |                     |                  |
| Pappenberger et al (2015)      | journal article  | EU                |            |                |                         |                              |                   |                     | X                |
| Parker & Tunstall (2007)       | report           | UK                |            |                | X                       |                              |                   |                     |                  |
| Parker (1991)                  | report           | UK                |            |                |                         | X                            |                   |                     |                  |
| Parker et al (2005)            | journal article  | UK                |            |                | X                       |                              |                   |                     |                  |
| Parker et al (2007a)           | journal article  | UK                |            |                |                         | X                            |                   |                     |                  |
| Parker et al (2007b)           | journal article  | UK                |            |                |                         | X                            |                   |                     |                  |
| Parker et al (2009a)           | report           | UK                |            |                | X                       |                              |                   |                     |                  |
| Parker et al (2009b)           | journal article  | UK                |            |                | X                       |                              |                   |                     |                  |
| Penning-Rowsell & Green (2000) | journal article  | UK                |            |                | X                       |                              |                   |                     |                  |
| Penning-Rowsell et al (2005)   | report           | UK                |            |                |                         |                              | X                 |                     |                  |
| Perera et al (2019)            | report           | Global            |            |                | X                       |                              |                   |                     |                  |
| Priest et al (2011)            | journal article  | EU                |            |                |                         |                              |                   |                     | X                |
| Rai et al (2020)               | journal article  | Nepal             |            |                |                         | X                            |                   |                     |                  |
| Rose et al (2023)              | journal article  | US                |            |                |                         |                              |                   |                     | X                |
| Roulin (2007)                  | journal article  | Belgium           | X          |                |                         |                              |                   |                     |                  |
| Rozer et al (2016)             | journal article  | Germany           |            |                |                         | X                            |                   |                     |                  |
| RTI (2018)                     | report           | Bangladesh        |            |                |                         | X                            |                   |                     |                  |
| Schroter et al (2008)          | report           | Austria           |            |                |                         | X                            |                   |                     |                  |
| Schroter et al (2014)          | journal article  | Germany           |            |                |                         | X                            |                   |                     |                  |
| Smith (1981)                   | journal article  | Australia         |            |                |                         |                              | X                 |                     |                  |
| Stallings (1997)               | report           | US                |            |                |                         |                              |                   |                     | X                |

| Study                         | Publication Type | Country or Region | VOI Method |                | Prevented Damage Method |                              |                   |                     |                  |
|-------------------------------|------------------|-------------------|------------|----------------|-------------------------|------------------------------|-------------------|---------------------|------------------|
|                               |                  |                   | Deductive  | Inductive (SP) | Review or Conceptual    | Household or Business Survey | Expert Assessment | Flood Risk Modeling | Benefit Transfer |
| Steinfuhrer & Kuhlicke (2007) | report           | Germany           |            |                |                         | X                            |                   |                     |                  |
| Suckall & Soares (2022)       | journal article  | South Asia        |            |                | X                       |                              |                   |                     |                  |
| Tapsell et al (2008)          | report           | Germany           |            |                |                         |                              |                   |                     | X                |
| Thibout et al (2017)          | journal article  | Canada            | X          |                |                         |                              |                   |                     |                  |
| Thieken et al (2005)          | journal article  | Germany           |            |                |                         | X                            |                   |                     |                  |
| Thieken et al (2007)          | journal article  | Germany           |            |                |                         | X                            |                   |                     |                  |
| Torterotot et al (1992)       | book chapter     | France            |            |                |                         | X                            |                   |                     |                  |
| Tunstall et al (2006)         | report           | UK                |            |                |                         | X                            |                   |                     |                  |
| Van den Bergh & Roulin (2010) | journal article  | Belgium           | X          |                |                         |                              |                   |                     |                  |
| Verkade & Werner (2011)       | journal article  | UK                | X          |                |                         |                              |                   |                     |                  |
| Vogel et al (2018)            | journal article  | Germany           |            |                |                         | X                            |                   |                     |                  |
| Walser & Rotach (2006)        | conf. proc.      | Switzerland       | X          |                |                         |                              |                   |                     |                  |
| Wind et al (1999)             | journal article  | Netherlands       |            |                |                         |                              |                   | X                   |                  |
| Yoe (1994)                    | report           | US                |            |                | X                       |                              |                   |                     |                  |
